# Supplementary material
Source: ML conference proceedings conference paper supplement (https://openreview.net/forum?id=C1mPUP7uKNp)
Supplement: supplementary_material [file attachment]

---

# Supplementary Material

## MCUNetV2: Memory-Efficient Patch-based Inference for Tiny Deep Learning

---

### Contents

|          |                                                     |          |
|----------|-----------------------------------------------------|----------|
| <b>A</b> | <b>Flow Chart of Contributions</b>                  | <b>2</b> |
| <b>B</b> | <b>Experimental Details</b>                         | <b>2</b> |
| <b>C</b> | <b>Memory Distributions of Efficient Models</b>     | <b>3</b> |
| <b>D</b> | <b>Ablation Study on Neural Architecture Search</b> | <b>4</b> |
| <b>E</b> | <b>Qualitative Results of Face Detection</b>        | <b>5</b> |

## A Flow Chart of Contributions

We provide a flow chart to summarize our contributions in Figure S1.

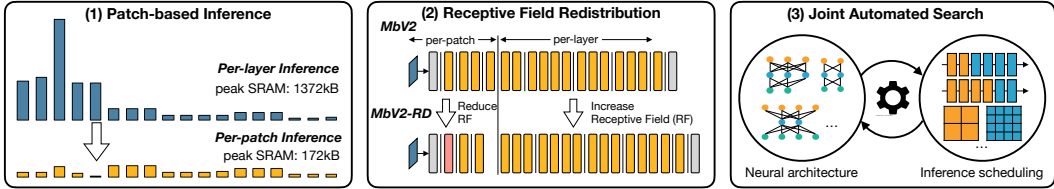

**Figure S1.** Contributions of MCUNetV2: (1) Analyze and find the imbalanced memory distribution; propose a patch-based inference scheduling to reduce the peak memory significantly; (2) Propose redistributing receptive fields to reduce the overhead from overlapping patches; (3) Jointly optimize the neural architecture and inference scheduling in the same loop.

## B Experimental Details

**Search space.** We used a MnasNet-like search space [12, 9, 1] for neural architecture search. The search space consists with the following knobs:

- Kernel size for each separable convolution block  $k_{[ ]}$ , choosing from  $\{3, 5, 7\}$ .
- Expansion ratio for each inverted residual block  $e_{[ ]}$ , choosing from  $\{3, 4, 6\}$ .
- Number of blocks for each stage  $d_{[ ]}$ , choosing from  $\{2, 3, 4\}$ .
- Width multiplier for each block  $w_{[ ]}$ , choosing from  $\{0.5, 0.75, 1.0\}$ .
- Input image resolution  $r$ , choosing from  $\{96, 128, 160, 192, 224, 256\}$ .

For the inference scheduling, apart from the optimization knobs inherited from TinyEngine [9], we also include the following knobs:

- Number of patches to split the input image  $p$ , choosing from  $\{1, 2, 3, 4\}$  according to the input image resolution. The image will be split into  $p \times p$  patches.
- Number of layers to run patch-based inference  $n, n < N$ , where  $N$  is the total number of layers. The rest of the network will be run with per-layer inference.

**Training.** We follow the training protocol in [9] for super network training. The training dataset is randomly split into a sub-training set and validation set. The validation set size is 10,000 for ImageNet [3] and 5,000 for other datasets. We first train the largest network in the search space on the sub-training set using SGD with batch size 1024, initial learning rate 0.2, weight decay  $4e-5$ , and a cosine learning rate decay. The training epochs is 150 for ImageNet [3] and 30 for VWW [2]. Afterward, we sort the channels according to their importance (we used L-1 norm for importance estimation [5]). Then we initialize the super network with the weights and then perform super network training using the same hyper-parameters for twice the epochs. For each iteration, 4 random architectures are sampled, and the gradients are averaged to train the network.

After getting the sub-network architecture from the evolutionary search, we fine-tuned the networks using 1/10 of the initial learning rate for 10 epochs.

**Validation.** To prevent over-fitting the real validation set, we evaluate the performance of each sub-network on the split validation set. The weights are taken from the super network using indexing. We re-calibrate the batch normalization statistics using 20 batches of data with a batch size 64.

**Evolutionary search.** We used evolutionary search to find the best sub-network architecture under certain constraints. We use a population size of 100. We randomly sample 100 sub-networks satisfying the constraints to form the first generation of population. For each iteration, we only keep the top-20 candidates with the highest accuracy. Then we perform crossover to generate 50 new candidates and mutation to generate another 50, forming a new generation. The mutation rate is 0.1. We repeat the process for 30 iterations and choose the sub-network with the highest accuracy on the split validation set.

**Quantization.** We perform int8 quantization following the format in [8]. To reduce the accuracy loss from quantization, we perform quantization-aware training for 10 epochs.

## C Memory Distributions of Efficient Models

We further provide the memory distributions of three efficient models: MnasNet [12], FBNet [14], and MCUNet-320kB [9] in Figure S2. All the models have a highly imbalanced memory distribution, even for MCUNet, which is specialized for memory-constrained settings. The results demonstrate the generality of the imbalanced memory distribution phenomenon. Enabling patch-based inference can cut the peak memory usage of the models by 3.5-6.1 $\times$ .

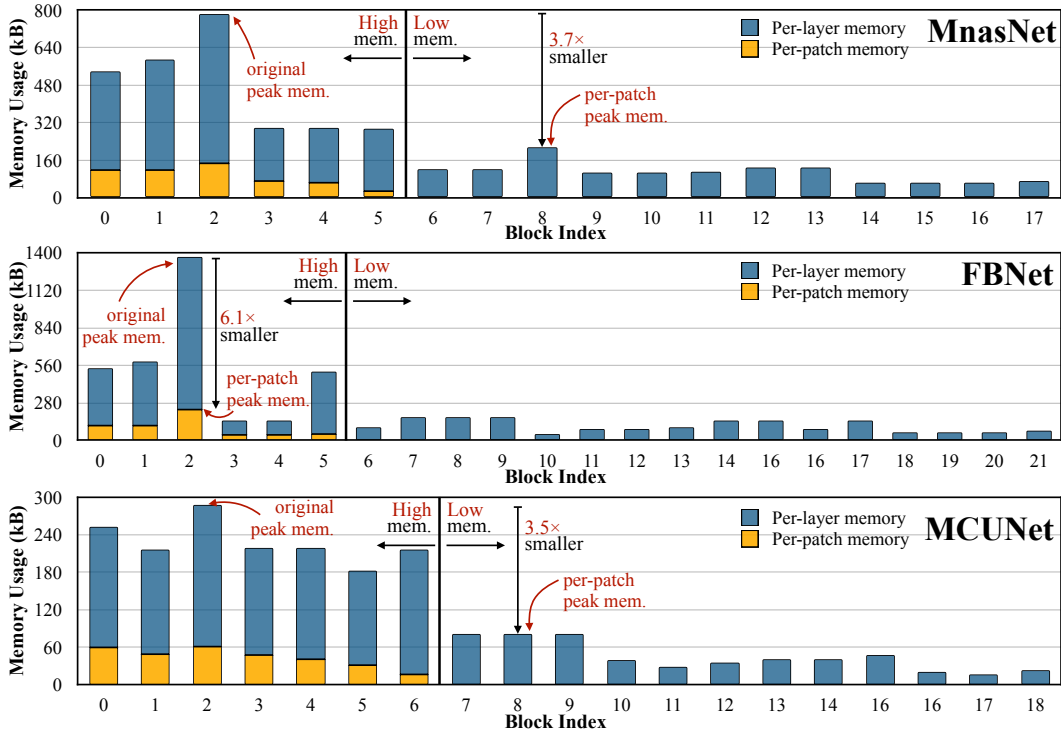

**Figure S2.** Memory distribution of MnasNet [12], FBNet [14], and MCUNet-320kB [9]. All the models have an imbalanced memory distribution. Enabling patch-based inference can reduce the peak memory by 3.5 – 6.1 $\times$ .

## D Ablation Study on Neural Architecture Search

Adding width multiplier  $w$  and input resolution  $r$  in the search space can greatly improve neural architecture search under tiny deep learning settings, because a flexible  $r$  and  $w$  allows us to globally *scale* the neural network to fit a tight resource budget. This is also mentioned as “search space optimization” in [9], where the authors proposed a two-step method that first chooses the optimal  $w$  and  $r$ , and then performs neural architecture search under the given  $w$  and  $r$ . Instead, we merge the two stages by directly adding  $r$  and  $w$  into the search space.

To show the advantage of our method, we conduct experiments on MobileNetV3 [6] space by extending it to support different  $r$ 's and  $w$ 's. We compared it with state-of-the-art methods under different computation budgets in Table S1. Our NAS method consistently outperforms existing techniques for tiny networks in terms of computation-accuracy trade-off. Existing techniques usually need a scaling method to scale down the searched network and fit different budgets. With the extended search space, all our models are derived from the *same* super network while obtaining the best accuracy. The accuracy improvement is more significant under a tiny computation setting ( $\leq 25$ M). We also try supporting flexible  $w$ 's per block, which improves the accuracy for smaller computation budgets. Therefore, we enable flexible  $w$ 's by default in our experiments.

**Table S1.** Our NAS method outperforms existing state-of-the-art tiny networks in terms of computation-accuracy trade-off, especially under tiny computation settings ( $<50$ M). All our models are derived from *the same search space*, while obtaining the best accuracy at different budgets. For models with \*, we re-measure the MACs and parameters using our profiler.

| Budget               | Model                                  | Setting      | MACs | Weights      | Top-1        | Top-5        |
|----------------------|----------------------------------------|--------------|------|--------------|--------------|--------------|
| 100M<br>MACs         | MobileNetV1 $0.5 \times (r=192)$ [7]   | Manual+Scale | 110M | 1.3M         | 61.7%        | 83.6%        |
|                      | MobileNetV2 $0.75 \times (r=160)$ [11] | Manual+Scale | 107M | 2.6M         | 66.4%        | 87.3%        |
|                      | MobileNetV3 Small $1.25 \times$ [6]    | NAS+Scale    | 91M  | 3.6M         | 70.4%        | -            |
|                      | EfficientNet-B <sup>-2</sup> [13, 4]   | NAS+Scale    | 98M  | 3.0M         | 70.5%        | 89.5%        |
|                      | TinyNet-C [4] *                        | NAS+Scale    | 103M | 2.5M         | 71.2%        | 89.7%        |
|                      | Ours (uniform $w$ )                    | Joint Search | 98M  | 4.2M         | <b>72.3%</b> | <b>90.6%</b> |
| Ours (flexible $w$ ) | Joint Search                           | 99M          | 3.9M | <b>72.3%</b> | <b>90.5%</b> |              |
| 50M<br>MACs          | MobileNetV2 $0.35 \times$ [11]         | Manual+Scale | 59M  | 1.7M         | 60.3%        | 82.9%        |
|                      | MnasNet-A1 $0.35 \times$ [12]          | NAS+Scale    | 63M  | 1.7M         | 64.1%        | 85.1%        |
|                      | MnasNet-search1 [12]                   | NAS          | 65M  | 1.9M         | 64.9%        | -            |
|                      | EfficientNet-B <sup>-3</sup> [13, 4]   | NAS+Scale    | 51M  | 2.0M         | 65.0%        | 85.2%        |
|                      | TinyNet-D [4] *                        | NAS+Scale    | 53M  | 2.3M         | 67.0%        | 87.1%        |
|                      | MobileNetV3 Small $1.0 \times$ [6]     | NAS          | 56M  | 2.5M         | 67.4%        | -            |
|                      | Ours (uniform $w$ )                    | Joint Search | 50M  | 2.8M         | 67.9%        | 87.7%        |
| Ours (flexible $w$ ) | Joint Search                           | 50M          | 3.5M | <b>68.8%</b> | <b>88.2%</b> |              |
| 25M<br>MACs          | MobileNetV2 $0.35 \times (r=160)$ [11] | Manual+Scale | 30M  | 1.7M         | 55.7%        | 79.1%        |
|                      | MnasNet-A1 $0.57 \times (r=128)$ [12]  | NAS+Scale    | 22M  | 1.7M         | 54.8%        | 78.1%        |
|                      | EfficientNet-B <sup>-4</sup> [13, 4]   | NAS+Scale    | 24M  | 1.3M         | 56.7%        | 79.8%        |
|                      | MobileNetV3 Small $0.5 \times$ [6]     | NAS+Scale    | 23M  | 1.6M         | 58.0%        | -            |
|                      | TinyNet-E [4] *                        | NAS+Scale    | 25M  | 2.0M         | 59.9%        | 81.1%        |
|                      | Ours (uniform $w$ )                    | Joint Search | 25M  | 2.6M         | 63.2%        | 84.7%        |
| Ours (flexible $w$ ) | Joint Search                           | 25M          | 3.2M | <b>63.9%</b> | <b>84.9%</b> |              |

## E Qualitative Results of Face Detection

We provide the face detection results on WIDER FACE validation set with RNNPool-Face-Quant [10] and MCUNetV2-S. The quantitative results are shown in Table S2, where we follow [10] to calculate the peak memory. Our model has better mAP at  $1.3\times$  smaller peak memory. The qualitative results are shown in Figure S3. Our model is more robust to poses and background false positives.

**Table S2.** MCUNetV2-S outperforms RNNPool-Face-Quant [10] on WIDER FACE at  $1.3\times$  smaller peak memory.

| Method                  | MACs ↓       | Peak Memory ↓<br>(int8)      | mAP ↑       |             |             | mAP ( $\leq 3$ faces) ↑ |             |             |
|-------------------------|--------------|------------------------------|-------------|-------------|-------------|-------------------------|-------------|-------------|
|                         |              |                              | Easy        | Medium      | Hard        | Easy                    | Medium      | Hard        |
| RNNPool-Face-Quant [10] | 0.12G        | 225kB ( $1.3\times$ )        | 0.80        | 0.78        | 0.53        | 0.84                    | 0.83        | 0.81        |
| MCUNetV2-S              | <b>0.11G</b> | <b>168kB</b> ( $1.0\times$ ) | <b>0.85</b> | <b>0.81</b> | <b>0.55</b> | <b>0.90</b>             | <b>0.89</b> | <b>0.87</b> |

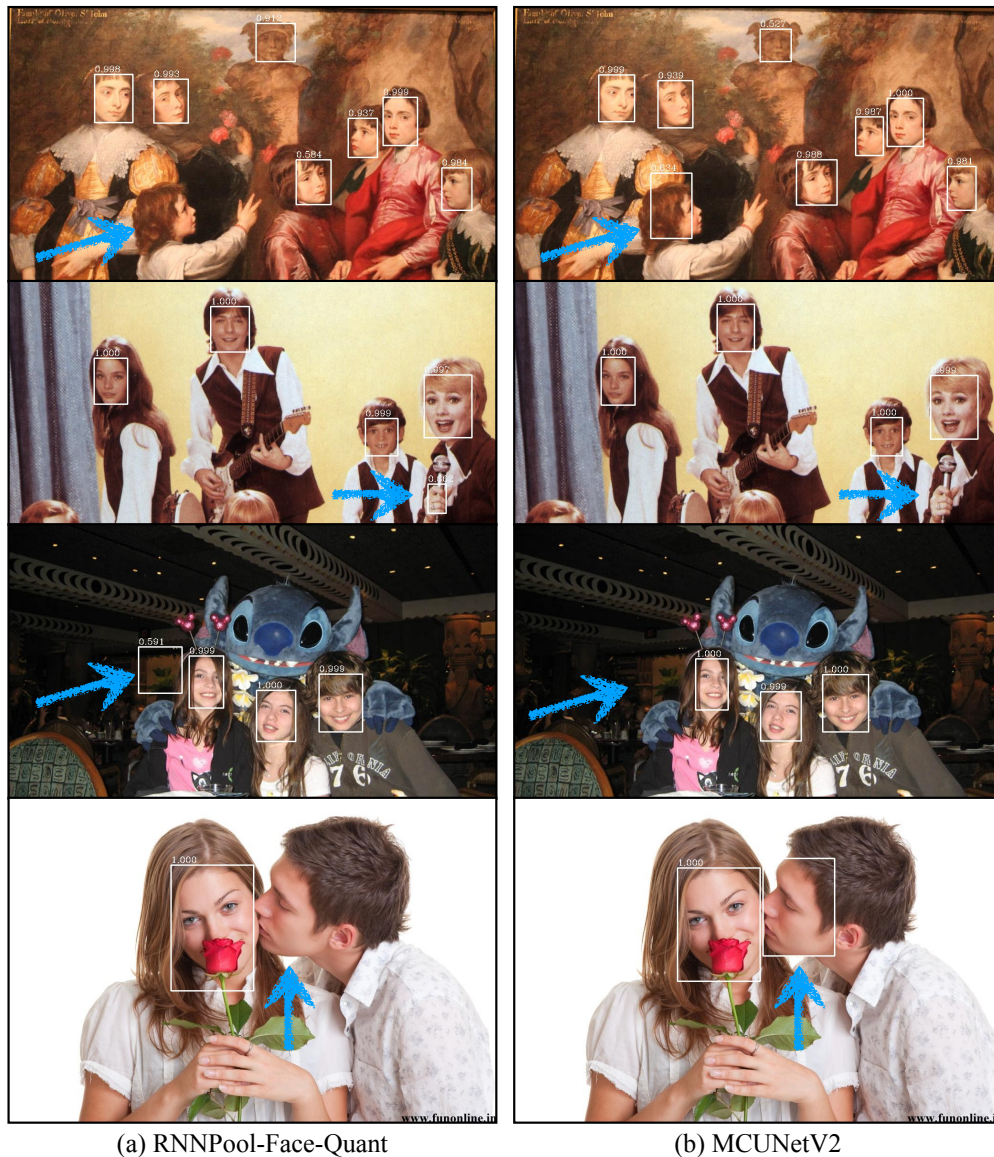

**Figure S3.** Qualitative results of face detection with RNNPool-Face-Quant [10] and MCUNetV2-S on WIDER FACE [15] validation set. Check the blue arrows: our model is more robust to poses and background false positives. The predictions are filtered with confidence threshold 0.5.

## References

- [1] Han Cai, Ligeng Zhu, and Song Han. ProxylessNAS: Direct Neural Architecture Search on Target Task and Hardware. In *ICLR*, 2019.
- [2] Aakanksha Chowdhery, Pete Warden, Jonathon Shlens, Andrew Howard, and Rocky Rhodes. Visual wake words dataset. *arXiv preprint arXiv:1906.05721*, 2019.
- [3] Jia Deng, Wei Dong, Richard Socher, Li-Jia Li, Kai Li, and Li Fei-Fei. ImageNet: A Large-Scale Hierarchical Image Database. In *CVPR*, 2009.
- [4] Kai Han, Yunhe Wang, Qiulin Zhang, Wei Zhang, Chunjing Xu, and Tong Zhang. Model rubik’s cube: Twisting resolution, depth and width for tinynets. *Advances in Neural Information Processing Systems*, 33, 2020.
- [5] Song Han, Jeff Pool, John Tran, and William J. Dally. Learning both Weights and Connections for Efficient Neural Networks. In *NeurIPS*, 2015.
- [6] Andrew Howard, Mark Sandler, Grace Chu, Liang-Chieh Chen, Bo Chen, Mingxing Tan, Weijun Wang, Yukun Zhu, Ruoming Pang, Vijay Vasudevan, Quoc V. Le, and Hartwig Adam. Searching for MobileNetV3. In *ICCV*, 2019.
- [7] Andrew G. Howard, Menglong Zhu, Bo Chen, Dmitry Kalenichenko, Weijun Wang, Tobias Weyand, Marco Andreetto, and Hartwig Adam. MobileNets: Efficient Convolutional Neural Networks for Mobile Vision Applications. *arXiv*, 2017.
- [8] Benoit Jacob, Skirmantas Kligys, Bo Chen, Menglong Zhu, Matthew Tang, Andrew Howard, Hartwig Adam, and Dmitry Kalenichenko. Quantization and training of neural networks for efficient integer-arithmetic-only inference. In *Proceedings of the IEEE Conference on Computer Vision and Pattern Recognition*, pages 2704–2713, 2018.
- [9] Ji Lin, Wei-Ming Chen, Yujun Lin, John Cohn, Chuang Gan, and Song Han. Mccunet: Tiny deep learning on iot devices. In *NeurIPS*, 2020.
- [10] Oindrila Saha, Aditya Kusupati, Harsha Vardhan Simhadri, Manik Varma, and Prateek Jain. Rnnpool: Efficient non-linear pooling for ram constrained inference. *arXiv preprint arXiv:2002.11921*, 2020.
- [11] Mark Sandler, Andrew Howard, Menglong Zhu, Andrey Zhmoginov, and Liang-Chieh Chen. MobileNetV2: Inverted Residuals and Linear Bottlenecks. In *CVPR*, 2018.
- [12] Mingxing Tan, Bo Chen, Ruoming Pang, Vijay Vasudevan, Mark Sandler, Andrew Howard, and Quoc V Le. MnasNet: Platform-Aware Neural Architecture Search for Mobile. In *CVPR*, 2019.
- [13] Mingxing Tan and Quoc Le. Efficientnet: Rethinking model scaling for convolutional neural networks. In *International Conference on Machine Learning*, pages 6105–6114. PMLR, 2019.
- [14] Bichen Wu, Xiaoliang Dai, Peizhao Zhang, Yanghan Wang, Fei Sun, Yiming Wu, Yuandong Tian, Peter Vajda, Yangqing Jia, and Kurt Keutzer. FBNet: Hardware-Aware Efficient ConvNet Design via Differentiable Neural Architecture Search. In *CVPR*, 2019.
- [15] Shuo Yang, Ping Luo, Chen Change Loy, and Xiaoou Tang. Wider face: A face detection benchmark. In *IEEE Conference on Computer Vision and Pattern Recognition (CVPR)*, 2016.
